# Supplementary material for: High-throughput and Sensitive Immunopeptidomics Platform Reveals Profound Interferonγ-Mediated Remodeling of the Human Leukocyte Antigen (HLA) Ligandome
Source: PubMed Central journal article supplement (PMC5836376; doi:10.1074/mcp.tir117.000383), 2017-12-14
Supplement: supp_TIR117.000383_132937_2_supp_37764_p0v9mk.pdf [file supp_TIR117.000383_132937_2_supp_37764_p0v9mk.pdf]

Table S2. Experimental design

| Sample Name | Type of replicate |    | HLA     | Cell Count | Plate Exp. Number | Well Position | Injection Amount | Raw file name                                          |                                                 |
|-------------|-------------------|----|---------|------------|-------------------|---------------|------------------|--------------------------------------------------------|-------------------------------------------------|
| RA957       | BR                | PR | MSR     | HLA-Ip     | 1.00E+08          | 1             | A1               | 1/3                                                    | 20170302_QEh1_LC2_FaMa_ChCh_SA_HLApl_RA957_1_R1 |
|             |                   |    | MSR     | HLA-Ip     | 1.00E+08          | 1             | A1               | 1/3                                                    | 20170302_QEh1_LC2_FaMa_ChCh_SA_HLApl_RA957_1_R2 |
|             |                   | PR | MSR     | HLA-Ip     | 1.00E+08          | 1             | A2               | 1/3                                                    | 20170302_QEh1_LC2_FaMa_ChCh_SA_HLApl_RA957_2_R1 |
|             |                   |    | MSR     | HLA-Ip     | 1.00E+08          | 1             | A2               | 1/3                                                    | 20170302_QEh1_LC2_FaMa_ChCh_SA_HLApl_RA957_2_R2 |
|             |                   | PR | MSR     | HLA-Ip     | 1.00E+08          | 1             | A3               | 1/3                                                    | 20170302_QEh1_LC2_FaMa_ChCh_SA_HLApl_RA957_3_R1 |
|             |                   |    | MSR     | HLA-Ip     | 1.00E+08          | 1             | A3               | 1/3                                                    | 20170302_QEh1_LC2_FaMa_ChCh_SA_HLApl_RA957_3_R2 |
| CD165       | BR                | PR | HLA-Ip  | 1.00E+08   | 1                 | A4            | 1/3              | 20170303_QEh1_LC2_FaMa_ChCh_SA_HLApl_CD165spike_1_R1   |                                                 |
|             |                   | PR | HLA-Ip  | 1.00E+08   | 1                 | B2            | 1/3              | 20170303_QEh1_LC2_FaMa_ChCh_SA_HLApl_CD165spike_2_R1   |                                                 |
|             |                   | PR | HLA-Ip  | 1.00E+08   | 1                 | B12           | 1/3              | 20170303_QEh1_LC2_FaMa_ChCh_SA_HLApl_CD165spike_3_R1   |                                                 |
| CM467       | BR                | PR | HLA-Ip  | 1.00E+08   | 1                 | A11           | 1/3              | 20170303_QEh1_LC2_FaMa_ChCh_SA_HLApl_CM647_1_R1        |                                                 |
|             |                   | PR | HLA-Ip  | 1.00E+08   | 1                 | A12           | 1/3              | 20170303_QEh1_LC2_FaMa_ChCh_SA_HLApl_CM647_2_R1        |                                                 |
|             |                   | PR | HLA-Ip  | 1.00E+08   | 1                 | B1            | 1/3              | 20170303_QEh1_LC2_FaMa_ChCh_SA_HLApl_CM647_3_R1        |                                                 |
| JY          | BR                | PR | HLA-Ip  | 1.00E+08   | 1                 | A9            | 1/3              | 20170303_QEh1_LC2_FaMa_ChCh_SA_HLApl_JY_1_R1_exp2      |                                                 |
|             |                   | PR | HLA-Ip  | 1.00E+08   | 1                 | A10           | 1/3              | 20170303_QEh1_LC2_FaMa_ChCh_SA_HLApl_JY_2_R1_exp2      |                                                 |
|             |                   | PR | HLA-Ip  | 1.00E+08   | 1                 | B10           | 1/3              | 20170303_QEh1_LC2_FaMa_ChCh_SA_HLApl_JY_3_R1_exp2      |                                                 |
| PD42        | BR                | PR | HLA-Ip  | 1.00E+08   | 1                 | B3            | 1/3              | 20170303_QEh1_LC2_FaMa_ChCh_SA_HLApl_PD42_1_R1         |                                                 |
|             |                   | PR | HLA-Ip  | 1.00E+08   | 1                 | B4            | 1/3              | 20170303_QEh1_LC2_FaMa_ChCh_SA_HLApl_PD42_2_R1         |                                                 |
|             |                   | PR | HLA-Ip  | 1.00E+08   | 1                 | B5            | 1/3              | 20170303_QEh1_LC2_FaMa_ChCh_SA_HLApl_PD42_3_R1         |                                                 |
| TIL1        | BR                | PR | HLA-Ip  | 1.00E+08   | 1                 | A5            | 1/3              | 20170303_QEh1_LC2_FaMa_ChCh_SA_HLApl_TIL1_1_R1         |                                                 |
|             |                   | PR | HLA-Ip  | 1.00E+08   | 1                 | A6            | 1/3              | 20170303_QEh1_LC2_FaMa_ChCh_SA_HLApl_TIL1_2_R1         |                                                 |
|             |                   | PR | HLA-Ip  | 1.00E+08   | 1                 | A7            | 1/3              | 20170303_QEh1_LC2_FaMa_ChCh_SA_HLApl_TIL1_3_R1         |                                                 |
| TIL3        | BR                | PR | HLA-Ip  | 1.00E+08   | 1                 | B7            | 1/3              | 20170306_QEh1_LC2_FaMa_ChCh_SA_HLApl_TIL3_1_R1         |                                                 |
|             |                   | PR | HLA-Ip  | 1.00E+08   | 1                 | B8            | 1/3              | 20170306_QEh1_LC2_FaMa_ChCh_SA_HLApl_TIL3_2_R1         |                                                 |
|             |                   | PR | HLA-Ip  | 1.00E+08   | 1                 | B9            | 1/3              | 20170306_QEh1_LC2_FaMa_ChCh_SA_HLApl_TIL3_3_R1         |                                                 |
| CD165       | BR                | PR | HLA-IIp | 1.00E+08   | 1                 | A4            | 1/3              | 20170317_QEh1_LC2_FaMa_ChCh_SA_HLAplII_CD165spike_1_R1 |                                                 |
|             |                   | PR | HLA-IIp | 1.00E+08   | 1                 | B2            | 1/3              | 20170317_QEh1_LC2_FaMa_ChCh_SA_HLAplII_CD165spike_2_R1 |                                                 |
|             |                   | PR | HLA-IIp | 1.00E+08   | 1                 | B12           | 1/3              | 20170317_QEh1_LC2_FaMa_ChCh_SA_HLAplII_CD165spike_3_R2 |                                                 |
| CM467       | BR                | PR | HLA-IIp | 1.00E+08   | 1                 | A11           | 1/3              | 20170317_QEh1_LC2_FaMa_ChCh_SA_HLAplII_CM647_1_R1      |                                                 |
|             |                   | PR | HLA-IIp | 1.00E+08   | 1                 | A12           | 1/3              | 20170317_QEh1_LC2_FaMa_ChCh_SA_HLAplII_CM647_2_R1      |                                                 |
|             |                   | PR | HLA-IIp | 1.00E+08   | 1                 | B1            | 1/3              | 20170317_QEh1_LC2_FaMa_ChCh_SA_HLAplII_CM647_3_R1      |                                                 |
| PD42        | BR                | PR | HLA-IIp | 1.00E+08   | 1                 | B3            | 1/3              | 20170317_QEh1_LC2_FaMa_ChCh_SA_HLAplII_PD42_1_R1       |                                                 |
|             |                   | PR | HLA-IIp | 1.00E+08   | 1                 | B4            | 1/3              | 20170317_QEh1_LC2_FaMa_ChCh_SA_HLAplII_PD42_2_R1       |                                                 |
|             |                   | PR | HLA-IIp | 1.00E+08   | 1                 | B5            | 1/3              | 20170317_QEh1_LC2_FaMa_ChCh_SA_HLAplII_PD42_3_R1       |                                                 |
|             |                   | PR | HLA-IIp | 1.00E+08   | 1                 | A1            | 1/3              | 20170317_QEh1_LC2_FaMa_ChCh_SA_HLAplII_RA957_1_R1      |                                                 |

|          |    |         |         |          |     |     |                                                     |                                                        |
|----------|----|---------|---------|----------|-----|-----|-----------------------------------------------------|--------------------------------------------------------|
| RA957    | BR | PR      | HLA-IIp | 1.00E+08 | 1   | A2  | 1/3                                                 | 20170317_QEh1_LC2_FaMa_ChCh_SA_HLAplII_RA957_2_R1      |
|          |    | PR      | HLA-IIp | 1.00E+08 | 1   | A3  | 1/3                                                 | 20170317_QEh1_LC2_FaMa_ChCh_SA_HLAplII_RA957_3_R1      |
| TIL1     | BR | PR      | HLA-IIp | 1.00E+08 | 1   | A5  | 1/3                                                 | 20170317_QEh1_LC2_FaMa_ChCh_SA_HLAplII_TIL1_1_R1       |
|          |    | PR      | HLA-IIp | 1.00E+08 | 1   | A6  | 1/3                                                 | 20170317_QEh1_LC2_FaMa_ChCh_SA_HLAplII_TIL1_2_R1       |
|          |    | PR      | HLA-IIp | 1.00E+08 | 1   | A7  | 1/3                                                 | 20170303_QEh1_LC2_FaMa_ChCh_SA_HLAplII_TIL1_3_R1       |
| TIL3     | BR | PR      | HLA-IIp | 1.00E+08 | 1   | B7  | 1/3                                                 | 20170317_QEh1_LC2_FaMa_ChCh_SA_HLAplII_TIL3_1_R1       |
|          |    | PR      | HLA-IIp | 1.00E+08 | 1   | B8  | 1/3                                                 | 20170317_QEh1_LC2_FaMa_ChCh_SA_HLAplII_TIL3_2_R1       |
|          |    | PR      | HLA-IIp | 1.00E+08 | 1   | B9  | 1/3                                                 | 20170317_QEh1_LC2_FaMa_ChCh_SA_HLAplII_TIL3_3_R1       |
| JY       | BR | PR      | HLA-IIp | 1.00E+08 | 1   | A9  | 1/3                                                 | 20170320_QEh1_LC2_FaMa_ChCh_SA_HLAplII_JY_1_R1_exp2_R1 |
|          |    | PR      | HLA-IIp | 1.00E+08 | 1   | A10 | 1/3                                                 | 20170320_QEh1_LC2_FaMa_ChCh_SA_HLAplII_JY_1_R2_exp2_R1 |
|          |    | PR      | HLA-IIp | 1.00E+08 | 1   | B10 | 1/3                                                 | 20170320_QEh1_LC2_FaMa_ChCh_SA_HLAplII_JY_2_R1_exp2_R1 |
| mock     |    |         |         |          | 1   | A8  |                                                     |                                                        |
|          |    |         |         |          | 1   | B6  |                                                     |                                                        |
|          |    |         |         |          | 1   | B11 |                                                     |                                                        |
| 3830-NJF | BR | HLA-Ip  | 0.7-1 g | 2        | C6  | 1/3 | 20170320_QEh1_LC2_FaMaChCh_SA_HLApl_3830-NJF_1_R1   |                                                        |
|          | BR | HLA-Ip  | 0.7-1 g | 2        | C7  | 1/3 | 20170320_QEh1_LC2_FaMaChCh_SA_HLApl_3830-NJF_2_R1   |                                                        |
|          | BR | HLA-Ip  | 0.7-1 g | 2        | C8  | 1/3 | 20170320_QEh1_LC2_FaMaChCh_SA_HLApl_3830-NJF_3_R1   |                                                        |
| 3849-BR  | BR | HLA-Ip  | 0.7-1 g | 2        | C9  | 1/3 | 20170311_QEh1_LC2_FaMaChCh_SA_HLApl_3849-BR_2_R2    |                                                        |
|          | BR | HLA-Ip  | 0.7-1 g | 2        | C10 | 1/3 | 20170311_QEh1_LC2_FaMaChCh_SA_HLApl_3849-BR_3_R1    |                                                        |
| 3912-BAM | BR | HLA-Ip  | 1.47 g  | 2        | C11 | 1/3 | 20170311_QEh1_LC2_FaMaChCh_SA_HLApl_3912-BAM_1_R1   |                                                        |
| 3865-DM  | BR | HLA-Ip  | 1.39 g  | 2        | C12 | 1/3 | 201703011_QEh1_LC2_FaMaChCh_SA_HLApl_3865-DM_1_R1   |                                                        |
| 3830-NJF | BR | HLA-IIp | 0.7-1 g | 2        | C6  | 1/3 | 20170320_QEh1_LC2_FaMaChCh_SA_HLAplII_3830-NJF_1_R1 |                                                        |
|          | BR | HLA-IIp | 0.7-1 g | 2        | C7  | 1/3 | 20170320_QEh1_LC2_FaMaChCh_SA_HLAplII_3830-NJF_2_R1 |                                                        |
|          | BR | HLA-IIp | 0.7-1 g | 2        | C8  | 1/3 | 20170320_QEh1_LC2_FaMaChCh_SA_HLAplII_3830-NJF_3_R1 |                                                        |
| 3849-BR  | BR | HLA-IIp | 0.7-1 g | 2        | C9  | 1/3 | 20170320_QEh1_LC2_FaMaChCh_SA_HLAplII_3849-BR_2_R1  |                                                        |
|          | BR | HLA-IIp | 0.7-1 g | 2        | C10 | 1/3 | 20170320_QEh1_LC2_FaMaChCh_SA_HLAplII_3849-BR_3_R1  |                                                        |
| 3912-BAM | BR | HLA-IIp | 1.47 g  | 2        | C11 | 1/3 | 20170320_QEh1_LC2_FaMaChCh_SA_HLAplII_3912-BAM_1_R1 |                                                        |
| 3865-DM  | BR | HLA-IIp | 1.39 g  | 2        | C12 | 1/3 | 201703020_QEh1_LC2_FaMaChCh_SA_HLAplII_3865-DM_1_R1 |                                                        |
|          | BR | PR      | HLA-Ip  | 1.00E+07 | 3   | D5  | 1/3                                                 | 20170402_QEh1_LC1_FaMaChCh_SA_CD165_10M_1_R1           |
|          |    | PR      | HLA-Ip  | 3.00E+07 | 3   | D6  | 1/3                                                 | 20170402_QEh1_LC1_FaMaChCh_SA_CD165_30M_1_R1           |
|          |    | PR      | HLA-Ip  | 5.00E+07 | 3   | D7  | 1/3                                                 | 20170402_QEh1_LC1_FaMaChCh_SA_CD165_50M_1_R1           |
|          |    | PR      | HLA-Ip  | 7.00E+07 | 3   | D8  | 1/3                                                 | 20170413_QEh1_LC2_ChC_FaMa_SA_HLApl_CD165_70Mnew_1_R1  |
|          |    | PR      | HLA-Ip  | 1.00E+08 | 1   | A4  | 1/3                                                 | 20170303_QEh1_LC2_FaMa_ChCh_SA_HLApl_CD165spike_1_R1   |
|          | BR | PR      | HLA-Ip  | 1.00E+07 | 3   | E5  | 1/3                                                 | 20170402_QEh1_LC1_FaMaChCh_SA_CD165_10M_2_R1           |
|          |    | PR      | HLA-Ip  | 3.00E+07 | 3   | E6  | 1/3                                                 | 20170402_QEh1_LC1_FaMaChCh_SA_CD165_30M_2_R1           |
|          |    | PR      | HLA-Ip  | 5.00E+07 | 3   | E7  | 1/3                                                 | 20170402_QEh1_LC1_FaMaChCh_SA_CD165_50M_2_R1           |
|          |    | PR      | HLA-Ip  | 7.00E+07 | 3   | E8  | 1/3                                                 | 20170413_QEh1_LC2_ChC_FaMa_SA_HLApl_CD165_70Mnew_2_R1  |
|          |    | PR      | HLA-Ip  | 1.00E+08 | 1   | B2  | 1/3                                                 | 20170303_QEh1_LC2_FaMa_ChCh_SA_HLApl_CD165spike_2_R1   |
|          |    | PR      | HLA-Ip  | 1.00E+07 | 3   | F5  | 1/3                                                 | 20170402_QEh1_LC1_FaMaChCh_SA_CD165_10M_3_R1           |

|                   |         |          |          |                  |                                                      |     |                                                        |                                                                 |
|-------------------|---------|----------|----------|------------------|------------------------------------------------------|-----|--------------------------------------------------------|-----------------------------------------------------------------|
| CD165             | BR      | PR       | HLA-Ip   | 3.00E+07         | 3                                                    | F6  | 1/3                                                    | 20170402_QEh1_LC1_FaMaChCh_SA_CD165_30M_3_R1                    |
|                   |         | PR       | HLA-Ip   | 5.00E+07         | 3                                                    | F7  | 1/3                                                    | 20170402_QEh1_LC1_FaMaChCh_SA_CD165_50M_3_R1                    |
|                   |         | PR       | HLA-Ip   | 7.00E+07         | 3                                                    | F8  | 1/3                                                    | 20170413_QEh1_LC2_ChC_FaMa_SA_HLApl_CD165_70Mnew_3_R1           |
|                   |         | PR       | HLA-Ip   | 1.00E+08         | 1                                                    | B12 | 1/3                                                    | 20170303_QEh1_LC2_FaMa_ChCh_SA_HLApl_CD165spike_3_R1            |
|                   | BR      | PR       | HLA-IIp  | 1.00E+07         | 3                                                    | D5  | 1/3                                                    | 20170403_QEh1_LC1_FaMaChCh_SA_HLApl_CD165_10M_1_R1              |
|                   |         | PR       | HLA-IIp  | 3.00E+07         | 3                                                    | D6  | 1/3                                                    | 20170403_QEh1_LC1_FaMaChCh_SA_HLApl_CD165_30M_1_R1              |
|                   |         | PR       | HLA-IIp  | 5.00E+07         | 3                                                    | D7  | 1/3                                                    | 20170413_QEh1_LC2_ChC_FaMa_SA_HLApl_CD165_50Mmore_1_R1          |
|                   |         | PR       | HLA-IIp  | 7.00E+07         | 3                                                    | D8  | 1/3                                                    | 20170405_QEh1_LC1_FaMaChCh_SA_HLApl_CD165_70M_1_R1              |
|                   | BR      | PR       | HLA-IIp  | 1.00E+08         | 1                                                    | A4  | 1/3                                                    | 20170317_QEh1_LC2_FaMa_ChCh_SA_HLApl_CD165spike_1_R1            |
|                   |         | PR       | HLA-IIp  | 1.00E+07         | 3                                                    | E5  | 1/3                                                    | 20170403_QEh1_LC1_FaMaChCh_SA_HLApl_CD165_10M_2_R1_170404100220 |
|                   |         | PR       | HLA-IIp  | 3.00E+07         | 3                                                    | E6  | 1/3                                                    | 20170403_QEh1_LC1_FaMaChCh_SA_HLApl_CD165_30M_2_R1              |
|                   |         | PR       | HLA-IIp  | 5.00E+07         | 3                                                    | E7  | 1/3                                                    | 20170413_QEh1_LC2_ChC_FaMa_SA_HLApl_CD165_50Mmore_2_R1          |
|                   | BR      | PR       | HLA-IIp  | 7.00E+07         | 3                                                    | E8  | 1/3                                                    | 20170405_QEh1_LC1_FaMaChCh_SA_HLApl_CD165_70M_2_R1              |
|                   |         | PR       | HLA-IIp  | 1.00E+08         | 1                                                    | B2  | 1/3                                                    | 20170317_QEh1_LC2_FaMa_ChCh_SA_HLApl_CD165spike_2_R1            |
|                   |         | PR       | HLA-IIp  | 1.00E+07         | 3                                                    | F5  | 1/3                                                    | 20170403_QEh1_LC1_FaMaChCh_SA_HLApl_CD165_10M_3_R1              |
|                   |         | PR       | HLA-IIp  | 3.00E+07         | 3                                                    | F6  | 1/3                                                    | 20170403_QEh1_LC1_FaMaChCh_SA_HLApl_CD165_30M_3_R1              |
| BR                | PR      | HLA-IIp  | 5.00E+07 | 3                | F7                                                   | 1/3 | 20170413_QEh1_LC2_ChC_FaMa_SA_HLApl_CD165_50Mmore_3_R1 |                                                                 |
|                   | PR      | HLA-IIp  | 7.00E+07 | 3                | F8                                                   | 1/3 | 20170405_QEh1_LC1_FaMaChCh_SA_HLApl_CD165_70M_3_R1     |                                                                 |
|                   | PR      | HLA-IIp  | 1.00E+08 | 1                | B12                                                  | 1/3 | 20170317_QEh1_LC2_FaMa_ChCh_SA_HLApl_CD165spike_3_R2   |                                                                 |
|                   | BR      | HLA-Ip   | 1.50E+08 | 4                | G1                                                   | 1/2 | 20170608_QEh1_LC1_ChCh_FAMA_SA_HLAIp_UWB1289_ctrl_1_R2 |                                                                 |
| UWB.1<br>289 ctrl | BR      | HLA-Ip   | 1.50E+08 | 4                | G2                                                   | 1/2 | 20170608_QEh1_LC1_ChCh_FAMA_SA_HLAIp_UWB1289_ctrl_2_R2 |                                                                 |
|                   | BR      | HLA-Ip   | 1.50E+08 | 4                | G3                                                   | 1/2 | 20170608_QEh1_LC1_ChCh_FAMA_SA_HLAIp_UWB1289_ctrl_3_R2 |                                                                 |
|                   | BR      | HLA-Ip   | 1.50E+08 | 4                | G4                                                   | 1/2 | 20170608_QEh1_LC1_ChCh_FAMA_SA_HLAIp_UWB1289_ctrl_4_R2 |                                                                 |
|                   | BR      | HLA-Ip   | 1.50E+08 | 4                | G5                                                   | 1/2 | 20170608_QEh1_LC1_ChCh_FAMA_SA_HLAIp_UWB1289_IFNg_1_R2 |                                                                 |
| UWB.1<br>289 IFNg | BR      | HLA-Ip   | 1.50E+08 | 4                | G6                                                   | 1/2 | 20170608_QEh1_LC1_ChCh_FAMA_SA_HLAIp_UWB1289_IFNg_2_R2 |                                                                 |
|                   | BR      | HLA-Ip   | 1.50E+08 | 4                | G7                                                   | 1/2 | 20170608_QEh1_LC1_ChCh_FAMA_SA_HLAIp_UWB1289_IFNg_3_R2 |                                                                 |
|                   | BR      | HLA-Ip   | 1.50E+08 | 4                | G8                                                   | 1/2 | 20170608_QEh1_LC1_ChCh_FAMA_SA_HLAIp_UWB1289_IFNg_4_R2 |                                                                 |
|                   | BR      | HLA-Ip   | 1.00E+08 | different plates |                                                      | 1/3 | 20170609_QEh1_LC1_ChCh_FAMA_SA_HLAIp_JY_090517_3_R1    |                                                                 |
| BR                | HLA-Ip  | 1.00E+08 | 1/3      |                  | 20170609_QEh1_LC1_ChCh_FAMA_SA_HLAIp_JY_160517_1_R1  |     |                                                        |                                                                 |
| BR                | HLA-Ip  | 1.00E+08 | 1/3      |                  | 20170609_QEh1_LC1_ChCh_FAMA_SA_HLAIp_JY_210417_2_R1  |     |                                                        |                                                                 |
| BR                | HLA-IIp | 1.00E+08 | 1/3      |                  | 20170609_QEh1_LC1_ChCh_FAMA_SA_HLAIIp_JY_090517_3_R1 |     |                                                        |                                                                 |
| BR                | HLA-IIp | 1.00E+08 | 1/3      |                  | 20170609_QEh1_LC1_ChCh_FAMA_SA_HLAIIp_JY_160517_1_R1 |     |                                                        |                                                                 |
| BR                | HLA-IIp | 1.00E+08 | 1/3      |                  | 20170609_QEh1_LC1_ChCh_FAMA_SA_HLAIIp_JY_210417_2_R1 |     |                                                        |                                                                 |

BR: Separate cells pellets/tissue sections are biological replicates

PR: BR loaded onto several wells are plate replicates

MSR: PR measured twice are MS replicates

HLA-Ip: HLA class I peptides

HLA-IIp: HLA class II peptides
