# Supplementary material for: High-throughput and Sensitive Immunopeptidomics Platform Reveals Profound Interferonγ-Mediated Remodeling of the Human Leukocyte Antigen (HLA) Ligandome
Source: PubMed Central journal article supplement (PMC5836376; doi:10.1074/mcp.tir117.000383), 2017-12-14
Supplement: supp_TIR117.000383_132937_2_supp_37771_p0v9hm.pdf [file supp_TIR117.000383_132937_2_supp_37771_p0v9hm.pdf]

Table S4. Detailed MS/MS information about 3 selected isotopically heavy labeled synthetic peptides and their light counterparts used to measure technical reproducibility between the three replicates. Area under the curve, AUC; standard deviation, SD; coefficient variation, CV.

| Statistic on 3 peptides |                |                                                 |           |                                                 |           |                 |      |      |      |
|-------------------------|----------------|-------------------------------------------------|-----------|-------------------------------------------------|-----------|-----------------|------|------|------|
| Sequence                | Sample         | Heavy AUC                                       |           | Light AUC                                       |           | Ratio H/L       |      |      |      |
|                         |                | sum intensities of all charge states (1+,2+,3+) | log2(sum) | sum intensities of all charge states (1+,2+,3+) | log2(sum) | log2(H)/log2(L) | mean | SD   | CV   |
| KVKDDVDK(L)             | CD165-HLA-I-R1 | 1.0644E+10                                      | 33.31     | 2.3139E+08                                      | 27.79     | 1.20            | 1.22 | 0.01 | 0.01 |
|                         | CD165-HLA-I-R2 | 1.2504E+10                                      | 33.54     | 2.0281E+08                                      | 27.60     | 1.22            |      |      |      |
|                         | CD165-HLA-I-R3 | 1.6221E+10                                      | 33.92     | 1.7123E+08                                      | 27.35     | 1.24            |      |      |      |
| IYTSSVNR(L)             | CD165-HLA-I-R1 | 7.0302E+09                                      | 32.71     | 2.6195E+09                                      | 31.29     | 1.05            | 1.06 | 0.01 | 0.01 |
|                         | CD165-HLA-I-R2 | 1.1108E+10                                      | 33.37     | 3.1283E+09                                      | 31.54     | 1.06            |      |      |      |
|                         | CD165-HLA-I-R3 | 1.8435E+10                                      | 34.10     | 3.0362E+09                                      | 31.50     | 1.08            |      |      |      |
| QVISQAAVVH(A)           | CD165-HLA-I-R1 | 3.1127E+09                                      | 31.54     | 9.8878E+08                                      | 29.88     | 1.06            | 1.07 | 0.01 | 0.01 |
|                         | CD165-HLA-I-R2 | 4.6103E+09                                      | 32.10     | 1.1297E+09                                      | 30.07     | 1.07            |      |      |      |
|                         | CD165-HLA-I-R3 | 7.9096E+09                                      | 32.88     | 1.1323E+09                                      | 30.08     | 1.09            |      |      |      |
