# Supplementary material for: High-throughput and Sensitive Immunopeptidomics Platform Reveals Profound Interferonγ-Mediated Remodeling of the Human Leukocyte Antigen (HLA) Ligandome
Source: PubMed Central journal article supplement (PMC5836376; doi:10.1074/mcp.tir117.000383), 2017-12-14
Supplement: supp_TIR117.000383_132937_2_supp_37773_p0v9pn.pdf [file supp_TIR117.000383_132937_2_supp_37773_p0v9pn.pdf]

**Table S1. Clinical information and HLA typing.**

|                      | Clinical information |             | HLA A      |            | HLA B      |            | HLA C      |            | HLA DQB1       |               | HLA DRB1   |            |
|----------------------|----------------------|-------------|------------|------------|------------|------------|------------|------------|----------------|---------------|------------|------------|
|                      | Tumor; grade         | Age; Gender | 1st allele | 2nd allele | 1st allele | 2nd allele | 1st allele | 2nd allele | 1st allele     | 2nd allele    | 1st allele | 2nd allele |
| <b>CD165</b>         | -                    | -           | A*02:05    | A*24:02    | B*15:01    | B*50:01    | C*03:03    | C*06:02    | DQB1*03:01     | DQB1*03:01    | DRB1*11:01 | DRB1*11:01 |
| <b>CM647</b>         | -                    | -           | A*01:01    | A*24:02    | B*13:02    | B*39:06    | C*06:02    | C*12:03    | DQB1*02:02     | DQB1*05:02    | DRB1*07:01 | DRB1*16:01 |
| <b>PD 42</b>         | -                    | -           | A*02:06    | A*24:02    | B*07:02    | B*55:01    | C*01:02    | C*07:02    | DQB1*05        | DQB1*06       | DRB1*01:02 | DRB1*15:01 |
| <b>RA957</b>         | -                    | -           | A*02:20    | A*68:01    | B*35:03    | B*39:01    | C*04:01    | C*07:02    | DQB1*03:01     | DQB1*04:02    | DRB1*04:01 | DRB1*08:01 |
| <b>TIL1</b>          | -                    | -           | A*02:01    | A*02:01    | B*18:01    | B*38:01    | C*05:01    | C*05:01    | DQB1*03:01     | DQB1*05:01    | DRB1*01:01 | DRB1*04:08 |
| <b>TIL3</b>          | -                    | -           | A*01:01    | A*23:01    | B*07:02    | B*15:01    | C*12:03    | C*14:02    | DQB1*03:01     | DQB1*05:02    | DRB1*12:01 | DRB1*15:01 |
| <b>3830-NJF</b>      | Meningioma;1         | 45;M        | A*02:01    | A*03:01    | B*07:02    | B*07:02    | C*07:02    | C*07:02    | DQB1*03:01     | DQB1*03:02    | DRB1*04:04 | DRB1*11:01 |
| <b>3849-BR</b>       | Meningioma;3         | 65;M        | A*01:01    | A*31:01    | B*38:01    | B*44:02    | C*05:01    | C*12:03    | DQB1*03:01     | DQB1*03:01    | DRB1*11:04 | DRB1*11:04 |
| <b>3912-BAM</b>      | Meningioma;2         | 63;F        | A*01:01    | A*29:06    | B*08:01    | B*15:01    | C*03:04    | C*07:01    | DQB1*02:01     | DQB1*03:02    | DRB1*03:01 | DRB1*04:01 |
| <b>3865-DM</b>       | Meningioma;1         | 50;F        | A*01:01    | A*03:01    | B*35:01    | B*57:01    | C*04:01    | C*06:02    | DQB1*03:03     | DQB1*05:01    | DRB1*01:01 | DRB1*07:01 |
| <b>UWB.1 289 mut</b> | -                    | -           | A*03:01    | A*68:01    | B*07:02    | B*07:02    | C*03:32    | C*07:02    | n.a            | n.a           | n.a        | n.a        |
| <b>*JY</b>           | -                    | -           | A*02:01    | A*02:01    | B*07:02    | B*07:02    | C*07:02    | C*07:02    | HLA DQA1*30:11 | HLADPB1*02:01 | DRB1*04:04 | DRB1*13:01 |

\* From the European Collection of Authenticated Cell Cultures (ECACC), <http://www.phe-culturecollections.org.uk>
