# Supplementary material for: High-throughput and Sensitive Immunopeptidomics Platform Reveals Profound Interferonγ-Mediated Remodeling of the Human Leukocyte Antigen (HLA) Ligandome
Source: PubMed Central journal article supplement (PMC5836376; doi:10.1074/mcp.tir117.000383), 2017-12-14
Supplement: supp_TIR117.000383_132937_2_supp_37776_p0v9xx.pdf [file supp_TIR117.000383_132937_2_supp_37776_p0v9xx.pdf]

Table S5. Literature on HLA-I and HLA-II immunopeptidomics.

| Authors/Journal            |                                               | Sample preparation |                |                        |                                     |                                     |                                       |               |                                                  |                                                                          | MS measurement                   |            | Informatics                         |               |                                           |                     |
|----------------------------|-----------------------------------------------|--------------------|----------------|------------------------|-------------------------------------|-------------------------------------|---------------------------------------|---------------|--------------------------------------------------|--------------------------------------------------------------------------|----------------------------------|------------|-------------------------------------|---------------|-------------------------------------------|---------------------|
| Authors                    | Journal, year                                 | Sample type        | Crosslinker    | Antibody to bead Ratio | Number of cells per mL lysis buffer | Number of cells                     | Number of cells/antibody-linked beads | IP conditions | HLAIP Elution                                    | Separation of peptides                                                   | MS                               | MS/MS type | Software Analysis                   | FDR applied   | Total unique peptides                     | Raw files deposited |
| Ritz D. et al              | Proteomics, 2016                              | 6 cell lines       | n.a            | n.a                    | 5 x 10 <sup>7</sup> /mL             | 1 x 10 <sup>8</sup>                 | n.a                                   | 2h at 4°C     | 0.1 M acetic acid                                | MWCO (10 kDa) and C18-resin (for cell lines, only C18)                   | Q Exactive MS                    | HCD        | SEQUEST, MaxQuant                   | n.a, 1%       | 4000-7000                                 | n.a                 |
| Ternette N. et al          | European Journal of Immunology, 2016          | 4 cell lines/types | n.a            | 5 mg/mL                | 10 mL for 10 <sup>9</sup>           | 1 x 10 <sup>8</sup>                 | n.a                                   | n.a           | 5 mL 10% Acetic acid                             | off-line C18 fractionation                                               | Triple-TOF 5600, Orbitrap Elite  | CID, CID   | PEAKS, MASCOT                       | 5%            | 2416-6795                                 | n.a                 |
| Pymm P. et al              | Nature Structural and Molecular Biology, 2017 | 2 cell types       | DMP            | 10 mg/mL               | n.a                                 | 5 x 10 <sup>9</sup>                 | 2 mL beads                            | n.a           | 10% acetic acid                                  | off-line C18 fractionation                                               | Triple-TOF 5600plus              | CID        | ProteinPilot                        | 5%            | 8233, 8432 (non-transfected, transfected) | n.a                 |
| Bassani-Sternberg M. et al | Molecular and Cellular Proteomics, 2015       | 7 cell lines       | n.a            | n.a                    | n.a                                 | 5 x 10 <sup>8</sup>                 | n.a                                   | n.a           | 500 µL 0.1 N acetic acid, 7 elutions             | C18 (twice)                                                              | Q Exactive MS                    | HCD        | MaxQuant                            | 1%            | 2500-5500                                 | yes                 |
| Abelin JG. et al           | Immunity, 2017                                | 16 cell lines      | no crosslinker | n.a                    | 2.5- 5 x 10 <sup>7</sup> /mL        | 5-10 x 10 <sup>7</sup>              | 20 µL                                 | 3h            | 3% ACN/5% FA, 1% formic acid and 10% acetic acid | in-house C18 stage tip                                                   | Q Exactive HF and Q ExactivePlus | HCD        | Spectrum Mill                       | 1-2%          | 1000-3500                                 | yes                 |
| Khodadoust MS. et al       | Nature, 2017                                  | 2 cell lines       | n.a            | n.a                    | n.a                                 | 1x 10 <sup>8</sup> -10 <sup>9</sup> | n.a                                   | 5h at 4°C     | 10% acetic acid                                  | 10kDa molecular weight cut-off size filter and C18 based Stage tips      | LTQ Orbitrap Elite               | HCD or CID | SEQUEST and PEAKS DB                | 1%            | 8000-13000                                | n.a                 |
| Zarling AL. et al          | PNAS, 2006                                    | 4 cell lines       | n.a            | n.a                    | n.a                                 | 2-5 x 10 <sup>9</sup>               | n.a                                   | n.a           | 0.2 M acetic acid                                | filtration through 5 kDa cutoff filter                                   | FTICR                            | CID        | MASCOT                              | n.a           | >10000 peptides                           | n.a                 |
| Hassan C. et al            | Molecular and Cellular Proteomics, 2013       | 2 cell lines       | DMP            | 2.5 mg/mL              | 0.1 x 10 <sup>9</sup> cells/mL      | 4-6 x 10 <sup>10</sup>              | n.a                                   | 2.5 mL/min    | 10% acetic acid                                  | 10 kDa membrane (Pall macrosep centrifuge devices), SCF, IEF, and RP C18 | LTQ-FT Ultra MS                  | CID        | MASCOT                              | n.a           | HHC: 11000 peptides JY: 6500              | yes                 |
| Walz S. et al              | Blood, 2015                                   | 6 cell lines       | CNBr           | 1mg/40 mg              | 1 mL pellet / 3 mL lysis buffer     | 1 mL cell pellet                    | 1 mL pellet/1 mL beads                | o.n           | 0.2% TFA (40 µL per 40 mg of stationary phase)   | ultrafiltration through 10 kDa cut off membrane and C18 Zip Tips         | LTQ Orbitrap XL                  | CID        | MASCOT                              | 5%            | 1000-4000                                 | n.a                 |
| Alpizar A. et al           | Molecular and Cellular Proteomics, 2017       | 1 cell line        | n.a            | n.a                    | n.a                                 | 1 x 10 <sup>10</sup>                | n.a                                   | n.a           | 0.1% TFA                                         | Vivacon 2 and OMIX C18 tip                                               | Orbitrap Elite                   | ETHcD      | MASCOT, X!tandem2, MyriMatch, OMSSA | 1% (combined) | HLA B40: 7375                             | yes                 |
| Di Marco C. et al          | Journal of Immunology, 2017                   | 17 cell lines      | CNBr           | 1mg/40 mg              | 1 mL pellet / 3 mL lysis buffer     | 2.5 x 10 <sup>9</sup>               | 1 mL pellet/1 mL beads                | o.n           | 0.2% TFA                                         | ultrafiltration through 10 kDa cut off membrane and C18 Zip Tips         | Orbitrap Fusion Lumos            | CID        | SEQUEST Proteome Discoverer         | 5%            | 632-3463                                  | n.a                 |

HLA class I studies

## HLA class II studies

|                      |                                         |                                                             |      |           |                                 |                                                        |                                          |             |                                                     |                                                                     |                                               |               |                      |     |                                                                     |     |
|----------------------|-----------------------------------------|-------------------------------------------------------------|------|-----------|---------------------------------|--------------------------------------------------------|------------------------------------------|-------------|-----------------------------------------------------|---------------------------------------------------------------------|-----------------------------------------------|---------------|----------------------|-----|---------------------------------------------------------------------|-----|
| Walz S. et al        | Blood, 2015                             | 6 cell lines                                                | CNBr | 1mg/40 mg | 1 mL pellet / 3 mL lysis buffer | 1 mL cell pellet                                       | 1 mL pellet/ 1 mL beads                  | o.n         | 0.2% TFA (40 $\mu$ L per 40 mg of stationary phase) | ultrafiltration through 10 kDa cut off membrane and C18 Zip Tips    | LTQ Orbitrap XL                               | CID           | MASCOT               | 5%  | 200-1800                                                            | n.a |
| Khodadoust MS. et al | Nature, 2017                            | 2 cell lines                                                | n.a  | n.a       | n.a                             | $1 \times 10^8$ - $10^9$                               | n.a                                      | 5h at 4°C   | 10% acetic acid                                     | 10kDa molecular weight cut-off size filter and C18 based Stage tips | LTQ Orbitrap Elite                            | HCD or CID    | SEQUEST and PEAKS DB | 1%  | 7000-9000                                                           | n.a |
| Heyder T. et al      | Molecular and Cellular Proteomics, 2016 | PRIESS and bronchoalveolar lavage (BAL) cells from 7 donors | none | 1 to 1    | 800 $\mu$ L lysis buffer        | $1 \times 10^7$ (B cell line), $1-5 \times 10^7$ (BAL) | $1 \times 10^7$ cells / 40 $\mu$ L beads | 2h at RT    | 50% acetonitrile, 5% formic acid (5 bed volumes)    | SCX                                                                 | Qexactive, Qexactive Plus, LTQ Orbitrap Velos | HCD, HCD, CID | MASCOT               | 5%  | 0-250 (EBV-B-cell line PRIESS), 48-753 (BAL), 1500 peptides (total) | yes |
| Ciudad M. T. et al   | Journal of Leukocyte Biology, 2017      | MoDCs from 7 patients                                       | CNBr | 5 mg/mL   | n.a                             | $30-66 \times 10^6$                                    | n.a                                      | o.n at 4°C  | 10% acetic acid, 15 min at 70°C                     | C18 StageTip                                                        | LTQ Orbitrap XL                               | CID           | SEQUEST              | 1%  | 1319 peptides (total from 7 donors) 85-362 (unique peptides)        | n.a |
| van Haren S.D. et al | Molecular and Cellular Proteomics, 2011 | MoDCs from 4 donors                                         | CNBr | n.a       | n.a                             | $5 \times 10^6$                                        | n.a                                      | o. n at 4°C | 10% acetic acid, 15 min at 70°C                     | C18 ZipTip                                                          | LTQ Orbitrap XL                               | CID           | SEQUEST              | n.a | 270-930 peptides                                                    | n.a |
| Adamopoulos U. et al | Nature Communications, 2013             | Thymic DCs from 8 donors                                    | CnBr | n.a       | n.a                             | $3 \times 10^7$                                        | n.a                                      | o.n at 4 °C | 0.1% TFA                                            | MW cutoff filter of 10 kDa                                          | Waters Q-ToF Premier                          | CID           | MassLynx 4.0         | n.a | total: 221 peptides                                                 | n.a |
| Klatt M.G. et al     | Oncoimmunology, 2016                    | PBMCs and BMNCs from 30 donors                              | CnBr | 1mg/40 mg | n.a                             | n.a                                                    | 1 mL pellet/ 1 mL beads                  | o.n         | 0.2% TFA (40 $\mu$ L per 40 mg of stationary phase) | ultrafiltration through 10 kDa cut off membrane and C18 Zip Tips    | LTQ Orbitrap XL hybrid                        | CID           | MASCOT               | 5%  | 4-784 identified peptides                                           | n.a |
| Costantino C. et al  | PlosONE, 2012                           | B- and T cell lines from 2 donors                           | CnBr | n.a       | n.a                             | $10^7$ - $10^8$                                        | n.a                                      | n.a         | 0.1% TFA                                            | n.a                                                                 | LTQ                                           | CID           | SEQUEST              | n.a | 30-213 peptides                                                     | n.a |
